1

Research article

2 **Special care is needed in applying phylogenetic comparative methods to**  
3 **gene trees with speciation and duplication nodes**

4

5 Tina Begum<sup>1,2</sup>, Marc Robinson-Rechavi<sup>1,2\*</sup>

6

7

8 <sup>1</sup>Department of Ecology and Evolution, University of Lausanne, Lausanne, Switzerland

9 <sup>2</sup>SIB Swiss Institute of Bioinformatics, Lausanne, Switzerland

10

11 \*Corresponding author

12 E-mail: marc.robinson-rechavi@unil.ch

13

## 14 **Abstract**

15 How gene function evolves is a central question of evolutionary biology. It can be  
16 investigated by comparing functional genomics results between species and between genes.  
17 Most comparative studies of functional genomics have used pairwise comparisons. Yet it  
18 has been shown that this can provide biased results, since genes, like species, are  
19 phylogenetically related. Phylogenetic comparative methods should allow to correct for  
20 this, but they depend on strong assumptions, including unbiased tree estimates relative to  
21 the hypothesis being tested. Such methods have recently been used to test the “ortholog  
22 conjecture”, the hypothesis that functional evolution is faster in paralogs than in orthologs.  
23 Whereas pairwise comparisons of tissue specificity ( $\tau$ ) provided support for the ortholog  
24 conjecture, phylogenetic independent contrasts did not. Our reanalysis on the same gene  
25 trees identified problems with the time calibration of duplication nodes. We find that the  
26 gene trees used suffer from important biases, due to the inclusion of trees with no  
27 duplication nodes, to the relative age of speciations and duplications, to systematic  
28 differences in branch lengths, and to non-Brownian motion of tissue-specificity on many  
29 trees. We find that incorrect implementation of phylogenetic method in empirical gene  
30 trees with duplications can be problematic. Controlling for biases allows to successfully  
31 use phylogenetic methods to study the evolution of gene function, and provides some  
32 support for the ortholog conjecture using three different phylogenetic approaches.

33 Keywords: ortholog; paralog; gene expression; phylogenetic comparative methods;  
34 Brownian; Ornstein-Uhlenbeck

35

## 36 **Introduction**

37 The “ortholog conjecture”, a standard model of phylogenomics, has become a topic of  
38 debate in recent years (Koonin 2005; Studer and Robinson-Rechavi 2009; Nehrt et al. 2011;  
39 Altenhoff et al. 2012; Chen and Zhang 2012; Gabaldón and Koonin 2013; Rogozin et al.  
40 2014; Kryuchkova-Mostacci and Robinson-Rechavi 2016; Dunn et al. 2018; Stamboulian  
41 et al. 2020). The ortholog conjecture is routinely used by both experimental and  
42 computational biologists in predicting or understanding gene function. According to this  
43 model, orthologs (i.e. homologous genes which diverged by a speciation event) retain  
44 equivalent or very similar functions, whereas paralogs (i.e. homologous genes which  
45 diverged by a duplication event) share less similar functions (Studer and Robinson-Rechavi  
46 2009). This is linked to the hypothesis that paralogs evolve more rapidly. This hypothesis  
47 was challenged by results suggesting that paralogs would be functionally more similar than  
48 orthologs (Nehrt et al. 2011). Such findings not only raised questions on the evolutionary  
49 role of gene duplication but also questioned the reliability of using orthologs to annotate  
50 unknown gene functions in different species (Sonnhammer et al. 2014). Several studies  
51 (Altenhoff et al. 2012; Chen and Zhang 2012; Rogozin et al. 2014; Kryuchkova-Mostacci  
52 and Robinson-Rechavi 2016) later found support for the ortholog conjecture, mostly based  
53 on comparisons of gene expression data.

54 While all previous studies of the ortholog conjecture had used pairwise comparisons of  
55 orthologs and paralogs, a recent article suggested that this was flawed, and that  
56 phylogenetic comparative methods should be used (Dunn et al. 2018). Phylogenetic  
57 structure can violate the fundamental assumption of independent observations in statistics,  
58 and thus ignoring it can lead to mistakes (Felsenstein 1985). A solution is to use phylogeny-

59 based methods. Phylogenetic Independent Contrast (PIC) (Felsenstein 1985), and  
60 Phylogenetic Generalized Least-Square (PGLS) (Martins and Hansen 1997; Grafen 1989;  
61 Rohlf 2001) are the most commonly used phylogenetic comparative methods. They were  
62 developed under a purely neutral model of evolution, i.e. Brownian motion (BM). Such  
63 Brownian process have been extended using a maximum likelihood approach, to allow for  
64 different rates of evolution on different branches of a phylogeny (O’Meara et al. 2006;  
65 Thomas et al. 2006), and to include stabilizing selection in which the trait is shifted towards  
66 a single fitness optimum, or multiple different adaptive optima (i.e. “Ornstein-Uhlenbeck”  
67 or OU process) (Hansen 1997; Butler and King 2004; Beaulieu et al. 2012). These  
68 phylogenetic data modeling with different modes of trait evolution (e.g. BM, OU) require  
69 a priori knowledge of different states on the tree. Other approaches implemented a Markov  
70 chain Monte Carlo (MCMC) sampling in a Bayesian framework to accurately estimate the  
71 number, location, and magnitude of shifts in evolutionary rates, or in optimal trait values  
72 without a priori assignment of states (Eastman et al. 2011; Pennell et al. 2014; Uyeda and  
73 Harmon 2014; Catalan et al. 2019). Bayesian approaches are time consuming, while OU  
74 modeling with phylogenetic lasso algorithm allows a faster detection of directional  
75 selection due to a shift in optimal trait value (Khabbazian et al. 2016). Moreover, OU has  
76 been used to model gene expression evolution (Rohlf and Nielsen 2015; Chen et al. 2019).

77 Among all the phylogenetic methods, PIC is widely adopted for its relative simplicity, and  
78 its applicability to a wide range of statistical procedures (Cooper et al. 2016a; Dunn et al.  
79 2018). The performance of PIC relies on three basic assumptions: a correct tree topology;  
80 accurate branch lengths; and trait evolution following Brownian motion (where trait  
81 variance accrues as a linear function of time) (Felsenstein 1985; Garland 1992; Garland et

82 al. 1992; Díaz-Uriarte and Garland 1998; Freckleton and Harvey 2006; Cooper et al.  
83 2016a). If any of these assumptions is incorrect, this can lead to incorrect interpretation of  
84 results without control for biases (Diaz-Uriarte and Garland 1996; Díaz-Uriarte and  
85 Garland 1998). While previous applications of PIC used multivariate traits on pure  
86 speciation trees to explore the relationship between them, Dunn et al. (2018) took an  
87 innovative approach in applying PIC to compare the divergence rates of a univariate trait  
88 between two different node events (“speciation” and “duplication”), to test the ortholog  
89 conjecture. They performed extensive analyses in support of their results. However, such  
90 an application might be problematic since the time of occurrence of gene duplication, one  
91 of the two types of events compared, is unknowable by external information (e.g. no fossil  
92 evidence). Therefore, further study is required to understand why Dunn et al. (2018)  
93 obtained results which are inconsistent with previous studies. It is possible that all the  
94 conclusions drawn by previous studies on gene duplication are incorrect due to overlooking  
95 phylogenetic tree structure. If so, it should be well supported.

96 We re-examined the data of Dunn et al., after reproducing their results using the resources  
97 and scripts provided by the authors (Dunn et al. 2018). We have uncovered problems with  
98 the use of PIC on biased calibrated gene trees, violation of the underlying assumptions, and  
99 the inclusion of pure speciation gene trees. We used PIC on gene trees after fixing  
100 calibration bias for old duplication nodes. With proper controls, the phylogenetic method  
101 supports the ortholog conjecture. To verify this result, we also applied data modeling  
102 approaches using a maximum likelihood framework, and using a reversible-jump Bayesian  
103 MCMC algorithm. Support for the ortholog conjecture still holds with proper controls.

104

## 105 **Results**

### 106 **Issues with straightforward application of Phylogenetic Independent Contrasts** 107 **(PICs)**

108 Dunn et al. (2018) have made a relevant argument that the test should be done in a  
109 phylogenetic framework, since closely related species or genes tend to share more similar  
110 traits. They applied PIC method to a processed dataset of 8520 time-calibrated trees (details  
111 in the Materials and Methods, Table 1) by assuming that the computed node contrasts  
112 (PICs) are always phylogenetically independent, and reported evidence in contradiction  
113 with the ortholog conjecture for tissue-specificity  $\tau$  (median:  $\text{PIC}_{\text{speciation}} = 0.0072$ ,  
114  $\text{PIC}_{\text{duplication}} = 0.0051$ , one-sided Wilcoxon test  $P = 1$ ). Yet the same data supported the  
115 ortholog conjecture when analyzed by pairwise comparisons, both in Kryuchkova-  
116 Mostacci and Robinson-Rechavi (2016), and in the re-analysis by Dunn et al. (2018). To  
117 understand the incongruence between results of PIC and of pairwise comparison  
118 approaches, they performed simulations of  $\tau$  on their trees under the OC (ortholog  
119 conjecture), and under a null of uniform Brownian motion. PICs and pairwise comparisons  
120 have different expectations under the null ( $\sigma^2_{\text{duplication}} = \sigma^2_{\text{speciation}}$ ) and under the ortholog  
121 conjecture ( $\sigma^2_{\text{duplication}} > \sigma^2_{\text{speciation}}$ ) (Supplementary fig. S1). The simulation results of Dunn  
122 et al. (2018) indicated that the pairwise comparisons of events could not distinguish the  
123 two scenarios (null and OC), unlike the PIC method. As the result on their empirical data  
124 resembled their null simulation result, they questioned both the use of pairwise  
125 comparisons, and the support for the ortholog conjecture from tissue specificity data.

126 To understand their results, we first reproduced and reanalyzed the data of Dunn et al.  
127 (2018) by focusing on the phylogenetic approach. Dunn et al. reported a non-significant  
128 result ( $P = 1$ ) for the PIC under the null simulation as well as for the empirical data, using  
129 a Wilcoxon one-tailed rank test to check if the contrasts of duplication events are higher  
130 than the contrasts of speciation events. Surprisingly, our reanalysis with a Wilcoxon two-  
131 tailed rank test on the same data shows that the PIC rejects the null hypothesis on the null  
132 simulations (Fig. 1A), with significant support for higher contrasts after speciation than  
133 duplication. This means that the PIC method supports a trend opposite to the trend expected  
134 under the ortholog conjecture in a null simulation. This was robust to repeating the  
135 simulations with different random seed number (Supplementary fig. S2). This indicates  
136 that neither of the approaches, PIC or pairwise, worked properly for these calibrated trees,  
137 since both the approaches reject the null hypothesis when simulations are performed under  
138 the null. Similarly, when we used a Wilcoxon two-tailed rank test instead of a one-tailed  
139 test on the empirical data, the non-significant result ( $P = 1$ ) (Dunn et al. 2018) was also  
140 significant ( $P < 2.2e^{-16}$ ) in the same unexpected direction as the null simulation results.

141 Statistical non-independence among species trait values because of their phylogenetic  
142 relatedness can be measured by phylogenetic signal (Pagel 1999; Freckleton et al. 2002;  
143 Blomberg et al. 2003; Münkemüller et al. 2012; Molina-Venegas and Rodríguez 2017).  
144 Use of the PIC is mainly important for the data sets with strong phylogenetic signal, where  
145 it allows to recover phylogenetically independence. Dunn et al. (2018) used Blomberg's  
146  $K$ . Its value ranges from 0 to  $\infty$  for each tree, where a value of 0 indicates no phylogenetic  
147 signal for the trait studied, and a value close to 1 or higher indicates strong phylogenetic  
148 signal (Pagel 1999; Freckleton et al. 2002; Blomberg et al. 2003; Münkemüller et al. 2012;

149 Molina-Venegas and Rodríguez 2017). With a cutoff of  $K > 0.551$ , Dunn et al. (2018)  
150 obtained only 2082 trees (Table 1), 24.4% of the total, with strong phylogenetic signal. The  
151 phylogenetic method still rejects the null hypothesis under null simulations for those 2082  
152 trees using a Wilcoxon two-tailed rank test (Fig. 1B), showing that the problem is not  
153 simply due to low phylogenetic signal. Using a cut-off of  $P < 0.05$  together with  $K > 0.551$   
154 leads to 1135 statistically significant trees with strong phylogenetic signals, for which we  
155 obtained a similar result (Supplementary fig. S3). This means that the bias is not limited to  
156 the selection of tree sets or to the number of speciation or duplication events used for the  
157 analyses. Since the trend was similar for these 1135 trees we continued analyses with the  
158 2082 trees of Dunn et al. (2018) for consistency.

159 The accuracy and performance of the PIC method largely depend on proper branch length  
160 calibration in absolute time (e.g. in Million Years – My) (Garland 1992; Díaz-Uriarte and  
161 Garland 1998; Cooper et al. 2016a). We thus investigated possible biases created during  
162 calibration of gene trees. Due to non-availability of external references for duplication time  
163 points (e.g. no fossils), Dunn et al. (2018) used only 7 speciation time points to calibrate  
164 gene trees. The ages of other node events are estimated using the penalized likelihood  
165 method (Sanderson 2002) by the `chronos()` function of the “ape” R package (Paradis et al.  
166 2004), and varies for the same duplication clade labels even within the same gene trees.  
167 The oldest speciation age for their calibrated trees was 296 My (Table 1), corresponding to  
168 the use of chicken as the outgroup. Surprisingly, the calibrated node age of the oldest  
169 duplication event was 11799977 My (Table 1, Supplementary table S1), that is, 2600 times  
170 older than the Earth. This is indicative of issues with calibration. The tree pruning to species  
171 with  $\tau$  data (details in Materials and Methods) lead to trees for which all nodes older than



172 296 My are duplication or NA events, even if there were older speciation events present  
173 before pruning (Supplementary fig. S4A). If the root node of a pruned tree is a speciation,  
174 the duplication ages are constrained by speciation ages. Otherwise, there are no constraints  
175 for the duplication events older than the oldest speciation events (Supplementary fig. S4,  
176 Supplementary Table S1), which can introduce a calibration bias. This unreliable branch  
177 length estimation for the old duplication nodes eventually led to much larger expected  
178 variances for gene duplication events than for speciation events (Supplementary figs. S5A  
179 and S5B).

180 PIC of a node is a ratio of changes in trait values ( $\tau$  here) for descendant nodes to their  
181 expected variance, i.e. the lengths of the two branches that connect the node to its two  
182 descendants. This means that similar changes in  $\tau$  for two nodes can produce different PIC  
183 values, with the lower contrast for the node with higher expected variance (i.e., calibrated  
184 branch length). In the null simulations only the  $\tau$  values are simulated, while the branch  
185 lengths (hence the expected variances) are taken from the empirical data, and thus share its  
186 biases. This explains why contrasts are lower for duplications than for speciations under  
187 null simulations as well as with empirical data. Such calibration bias in branch lengths  
188 violates the second assumption of PIC applicability, and inflates type I error rates (Díaz-  
189 Uriarte and Garland 1996; Díaz-Uriarte and Garland 1998).

190

### 191 **Randomization tests to assess the performance of phylogenetic method**

192 We used randomization tests to assess bias in different analyses of the empirical dataset.  
193 Our expectation is that the trend of the empirical result should differ from the randomized

194 ones. In a first randomization test, we permuted the  $\tau$  values across the tips of each tree  
195 without altering the node events of the trees. By such randomization, the real phylogenetic  
196 relationships between trait values are removed for each tree. When we compared the node  
197 contrasts of the speciation and duplication events computed based on these 8420  
198 randomized  $\tau$  trees (Fig. 2A), we found the same pattern as reported for the empirical gene  
199 trees by Dunn et al. (2018), contrary to expectation. It confirms that results are driven by  
200 their large differences in branch lengths (i.e. in expected variances) (Fig. 2B), as on  
201 simulated null data. Any effect of trait divergence rates of speciation and duplication events  
202 is always masked by this branch length difference of node events. This violates the basic  
203 assumption of applicability of the PIC method to Brownian trait evolution. To remove the  
204 problem of difference in expected variances of the two events, we performed a second  
205 randomization test: we kept the original  $\tau$  value for tips but randomly shuffled the events  
206 (duplication, speciation, or NA) of internal nodes of the 8420 empirical gene trees to  
207 maintain the original proportions of speciation and duplication events. The resulting trend  
208 (Fig. 2C) still resembled the empirical gene trees data. This appears due to the fact that the  
209 majority of the nodes are speciations (Fig. 2D, Table 1) with node ages  $\leq 296$  My. Most  
210 of the trees with many duplication events on the other hand have ancient duplication events  
211 for which the evolutionary rates of duplication are often masked by the effect of longer  
212 branch lengths. Opposite to our expectation, the calibrated trees with no or few duplications  
213 have higher overall nodes contrast (apparent fast evolution) than trees with many  
214 duplications (apparent slow evolution). This might be due to greater difficulty in detecting  
215 paralogs for fast evolving genes. Therefore, reshuffling of the events may not change the  
216 observed pattern of higher speciation contrasts than duplication contrasts.

217 Out of 8520 calibrated trees, 2990 were pure speciation trees with no duplication events.  
218 For these 2990 trees, random shuffling of events had no impact. To avoid this bias, we  
219 removed those 2990 speciation trees as well as trees with negative branch lengths, and  
220 randomized the trait or the internal node events 100 times on the remaining 5479 trees.  
221 However, we still always obtained significantly higher contrasts of speciation than of  
222 duplication (Supplementary figs. S6A and S6B). The randomization tests pattern is the  
223 same when we used 2082 trees with strong phylogenetic signals (Supplementary figs. S6C  
224 and S6D).

225 All these analyses indicate that the results reported by Dunn et al. (2018) are biased by the  
226 calibrated phylogeny structures, and that this bias is not easy to correct. We propose three  
227 approaches to correct for this bias and recover a proper phylogenetic signal of trait  
228 evolution.

229

### 230 **Approach-1: PIC with diagnostic tests**

231 Diagnostic tests (details in the Materials and Methods) for each tree are essential to ensure  
232 phylogenetic independence of node contrasts, especially since there is evidence of bias in  
233 the calibrated trees. This can be verified by the lack of correlation between the absolute  
234 value of PICs of  $\tau$  and their standard deviations, node height, node age, or node depth  
235 (Garland 1992; Garland et al. 1992; Diaz-Uriarte and Garland 1996; Díaz-Uriarte and  
236 Garland 1998; Freckleton 2000; Freckleton and Harvey 2006; Cooper et al. 2016a). A  
237 statistically significant negative or positive correlation in any of the diagnostic tests  
238 confirms that the PICs for that tree are non-independent (Garland 1992; Garland et al. 1992;

239 Diaz-Uriarte and Garland 1996; Díaz-Uriarte and Garland 1998; Freckleton 2000;  
240 Freckleton and Harvey 2006; Cooper et al. 2016a); in practice, we used  $P < 0.05$  for  
241 significance.

242 We performed such diagnostic tests on 4288 trees, for which calibration biases are fixed  
243 for old duplication nodes (see Materials and Methods, Table 1). Among them only 2088  
244 (48.7%), which includes 15321 speciation and 6213 duplication nodes, passed all 4  
245 diagnostics tests for  $\tau$  evolution. We performed our PIC analyses separately for 3948 young  
246 ( $\leq 296$  My, the oldest speciation in the trees) and 2265 old ( $> 296$  My) duplication events.  
247 Analyses on young duplicates after diagnostic tests provided support for the ortholog  
248 conjecture (Fig. 3), but old duplicates did not. Randomization tests showed patterns distinct  
249 from real data only for the young duplicates (Supplementary figs. S7A and S7B), indicating  
250 a biological pattern rather than a data bias. Thus PIC on the trees after diagnostic plot tests  
251 supports the ortholog conjecture for young duplicates, whereas the inference remains  
252 biased for older duplicates.

253

## 254 **Approach-2: PIC with branch length transformation**

255 Most phylogenetic methods are developed for the Brownian model of trait evolution,  
256 including the PIC method (Felsenstein 1985; Cornwell and Nakagawa 2017). Deviations  
257 from pure BM violate the fundamental assumptions of PIC applicability and can affect its  
258 performance for testing hypotheses about correlated evolution (Garland 1992; Garland et  
259 al. 1992; Diaz-Uriarte and Garland 1996; Díaz-Uriarte and Garland 1998). Using model-  
260 fitting (see Materials and Methods), we found that 75.6% gene trees (Supplementary fig.

261 S8) supported the Ornstein-Uhlenbeck (OU) model. Remedial measures such as branch  
262 length transformations along with diagnostic tests, can substantially recover the  
263 performance of the PIC methods when character evolution is not BM or when contrasts are  
264 non-independent of the phylogeny (Garland et al. 1992; Diaz-Uriarte and Garland 1996;  
265 Díaz-Uriarte and Garland 1998).

266 We applied branch length transformation (details in the Materials and Methods) on all 4288  
267 trees, along with diagnostic tests for consistency. We found substantial support for the  
268 ortholog conjecture for the 4190 trees (97.7%) which pass diagnostic tests after branch  
269 length transformation (Fig. 4A). Due to the lack of absolute age for these transformed trees,  
270 we did not distinguish young and old duplicates. Applying such branch length  
271 transformation then diagnostic tests to the gene trees of Dunn et al. we also found support  
272 for the ortholog conjecture in 98.8% (8417 out of 8520) (Supplementary fig. S9A), as well  
273 as for 99.9% (2080 out of 2082) of their trees with strong phylogenetic signal  
274 (Supplementary fig. S10A). Randomization tests on all these sets of trees following branch  
275 length transformations clearly showed distinct patterns compared to the empirical data  
276 (Figs. 4B and 4C, Supplementary figs. S9B, S9C, S10B, S10C), indicating that results are  
277 not due to inference bias once the data is properly transformed.

### 278 **Approach-3: Phylogenetic data modeling**

279 State dependent model-fitting allows to compare the evolutionary rates ( $\sigma^2$ ), and the  
280 changes in adaptive optimum value ( $\theta$ ) associated to specific states (speciation or  
281 duplication) for each tree (Beaulieu et al. 2012; Clavel et al. 2015). Under the ortholog  
282 conjecture, our expectation is that there should be more shifts in optimum value of  $\tau$

283 between paralogs than orthologs. Moreover, the evolutionary rates after duplication should  
284 be higher than after speciation ( $\sigma^2_{\text{duplication}} > \sigma^2_{\text{speciation}}$ ). Of course, trends on empirical data  
285 should differ from randomized ones. When we modeled the evolution of  $\tau$  (see Materials  
286 and Methods), 32 out of 4288 trees failed to fit any model due to invariance in  $\tau$ . Among  
287 the others, 308 supported BM1, 704 BMM, 2874 OU1, and 370 OUM, as the best fit  
288 models (Supplementary fig. S8). We performed our analyses separately for young and old  
289 duplicates.

290 On the 8.6% multi optima trees (OUM) the optimum value are significantly higher for both  
291 young and old duplications ( $\theta_{\text{dup}} > \theta_{\text{spe}}$ ) (Supplementary Table S2). Thus paralogs regime  
292 shift towards higher tissue-specificity. These results are not observed on randomized trees,  
293 supporting a biological pattern in the data (Supplementary Table S2).

294 We also applied a Bayesian method (Udeya and Harmon 2014) on them to quantify the  
295 number of adaptive optimum shifts, as suggested for small trees (Cooper et al. 2016b).  
296 Unlike the other approach, such detection of evolutionary shifts in a phylogeny does not  
297 need a priori knowledge of different states on the tree. Using a strict posterior probability  
298 threshold of  $\geq 0.7$  with this method, we find that most optimum shifts per branch for  $\tau$   
299 follow duplications (median after speciation: 0%, after duplication: 12.5%, paired two-  
300 sided Wilcoxon rank-sum test  $P < 2.2e^{-16}$ ). An OU model can often be incorrectly favored  
301 over a BM model in a maximum likelihood framework when applied to trees with  $< 200$   
302 tips (Cooper et al. 2016b). Our gene trees have a median of only 15 tips. We thus applied  
303 a conservative Bayesian approach on all of the 3244 trees for which OU was the preferred  
304 model (OU1 + OUM). Even with such a strict posterior probability threshold of  $\geq 0.7$ , 1101  
305 trees (33.9%) still supported the OUM model, including 901 trees identified as OU1 by

306 maximum likelihood. We detected the same trend of optimum shifts per branch (median  
307 after speciation: 2.3%, after duplication: 10%, paired Wilcoxon rank-sum test  $P < 2.2e^{-16}$ ).  
308 These results are largely consistent for both young and old duplicates (Table 2;  
309 Supplementary Table S3). However, the rates of optimum shifts are faster only for young  
310 duplicates (Table 2; Supplementary Table S3).

311 Analyses on the trees where  $\sigma^2$  varies between events (BMM) also supports the ortholog  
312 conjecture for young duplicates (Table 3). Randomized data showed distinct patterns  
313 from empirical data. However, again there was neither support for the ortholog  
314 conjecture nor signal relative to randomization for the old duplicates.

## 315 **Discussion**

316 We agree with Dunn et al. (2018) that evolutionary comparisons should be done  
317 considering a phylogenetic framework when possible. However, this does not imply that  
318 phylogenetic methods can be applied easily to phylogenomics. To get a clear picture, we  
319 limited our study to the same gene trees used by Dunn et al. (2018). Our reanalysis  
320 identified problems generated by the time calibration of old duplication nodes of pruned  
321 trees, the inclusion of pure speciation gene trees, and violations of the Brownian model.  
322 The strongest bias was for duplication nodes preceding the oldest speciation nodes. This,  
323 in turn, introduced several biases in the analyses, and influenced results.

324 When we identified and controlled for such biases, PIC results changed to support the  
325 ortholog conjecture, consistent with our previous pairwise analysis (Kryuchkova-Mostacci  
326 and Robinson-Rechavi 2016) on the same  $\tau$  data. Our fundamental point is that the  
327 conclusions drawn by Dunn et al, but also by anyone else who will have followed the same  
328 approach of applying PIC to gene trees, are not reliable unless extreme care is taken. This  
329 is because gene trees with orthologs and paralogs have more complex evolutionary  
330 histories, and different sampling biases, than species trees for which these methods were  
331 developed.

332 To date, a few studies have applied phylogenetic comparative methods to understand the  
333 effect of gene duplication on functional evolution (Oakley et al. 2005; Oakley et al. 2006;  
334 Eng et al. 2009; Rohlf and Nielsen 2015; Dunn et al. 2018; Fukushima and Pollock 2020).  
335 None before Dunn et al. applied PIC method to compare speciation and duplication events  
336 on the same trees using a single continuous trait. Such application requires thorough testing



337 of the fundamental assumptions of the method on such time calibrated trees (Garland 1992;  
338 Garland et al. 1992; Diaz-Uriarte and Garland 1996; Díaz-Uriarte and Garland 1998;  
339 Freckleton 2000; Freckleton and Harvey 2006; Cooper et al. 2016a). Hence, we explored  
340 whether the application of a phylogenetic method might inflate errors (e.g. rejection of the  
341 null hypothesis in null condition) if applied without assumption testing. Indeed, it is the  
342 case (Figs. 1A and 1B). Along with the calibration bias for old duplication nodes, the  
343 relative ages of the speciation and duplication events strongly differ in these trees due to  
344 the choice of species. Using such trees without control for biases may bring about lack of  
345 statistical power to detect the signal of ortholog conjecture, and even bias towards an  
346 opposite pseudo-signal.

347 Time calibration of ancient duplication events is one of the major issues we uncovered.  
348 The approach of Dunn et al. considered pruned trees with available trait ( $\tau$  here) data for  
349 time-calibration using speciation time points (see Materials and Methods). Such pruned  
350 trees often have many duplication nodes older than the oldest speciation nodes. Sequence  
351 based evolutionary rate (e.g., dN/dS) analyses in different species have found higher  
352 sequence evolutionary rate following gene duplication (Conant and Wagner 2003; Kim  
353 and Yi 2006; Scannell and Wolfe 2008; Han et al. 2009; Studer and Robinson-Rechavi  
354 2009; Panchin et al. 2010; Pegueroles et al. 2013; Pich and Kondrashov 2014; Holland et  
355 al. 2017). Therefore, calibration bias is not surprising for those duplication nodes in the  
356 absence of time constraints (Supplementary figs. S4A-S4C, Supplementary Table S1).  
357 Instead, we performed time calibration before pruning, so that the oldest speciation time  
358 points can provide upper age limits and reduce calibration bias (Supplementary figs. S4D-  
359 S4F). This is strongly recommended since the performance of the phylogenetic methods

360 rely on accurate branch length information, especially for multi-states univariate trait  
361 analysis.

362 Dunn et al. (2018) performed several analyses (e.g. added random noise in the speciation  
363 calibration time points, extended terminal branch length, removed old duplication nodes,  
364 etc.) to take into account issues with branch lengths, but their simulations and our  
365 randomization tests show that they appear not to have been sufficient to correct for this  
366 bias (Figs. 2A and 2C). Dunn et al. also provided the `hutan::picx()` R function to compute  
367 PIC for OU trees. In their simulation-based function, they estimated ancestral states by the  
368 ‘GLS\_OUS’ method using the bias calibrated phylogeny. Therefore, their method does not  
369 add anything specific to deal with the OU trees. Since they did not control for phylogenetic  
370 independence of the contrasts, and did not consider the relative ages of the speciation and  
371 old duplication events, they always obtained lower PIC of duplication events. Due to such  
372 phylogenetic internal parameter dependence, their PIC analyses produced similar trends  
373 with real or randomized data.

374 Assumptions of proper branch length information and of Brownian motion of trait  
375 evolution are related, so that modifications of branch lengths can change the evolutionary  
376 model (Diaz-Uriarte and Garland 1996; Díaz-Uriarte and Garland 1998). Contrasting a  
377 single rate OU to BM models, Dunn et al. (2018) identified 99.9% gene trees which favored  
378 an OU model, more explicitly an OU1 model. This appears to be 67% when we performed  
379 multivariate data modeling in a maximum likelihood framework on trees with less or no  
380 calibration bias (Supplementary fig. S8). PIC analyses with diagnostic tests provided weak  
381 support for the ortholog conjecture for the young duplicates (Figs. 3A-3C), in contrast to  
382 previous results of Dunn et al. Small effect size difference in our inference is not surprising

383 since PIC is applied on OU trees. Similar patterns of results from empirical and  
384 randomization tests for the old duplicates indicate that one should be extremely careful  
385 before integrating them into a phylogenetic analysis. Branch length transformation  
386 attempts to transform the OU trees to BM trees to meet the underlying assumption of  
387 phylogenetic comparative method (Butler and King 2004). Hence, it can address the issue  
388 of low power when underlying assumptions of phylogenetic methods are violated (Díaz-  
389 Uriarte and Garland 1996; Díaz-Uriarte and Garland 1998). Following this approach along  
390 with the diagnostic tests, we obtained substantial support for the ortholog conjecture (Figs.  
391 4A-4C, Supplementary figs. S9 and S10).

392 Phylogenetic data modeling also appears to be a powerful tool for such hypothesis testing,  
393 where one can estimate the trait evolutionary rates or optima shift rates per event without  
394 transforming OU trees to BM trees. More support for the OU trees (Supplementary fig. S8)  
395 could be due to the fact that we performed multivariate evolutionary model-fitting mostly  
396 on small trees (Cooper et al. 2016b). Among them only 8.6% trees supported the OUM  
397 model. Following the recommendation of Cooper et al. (2016), we applied Bayesian  
398 approach on small trees to accurately identify multi optima trees. Although previous studies  
399 (Uyeda and Harmon 2014; Khabbazian et al. 2016; Uyeda et al. 2017) have suggested a  
400 liberal cutoff of  $\geq 0.2$  to detect an optimum shift with a Bayesian approach, we used a strict  
401 posterior probability cutoff of  $\geq 0.7$ . We performed our analyses on the 33.9% OUM trees  
402 passing such a strict posterior probability threshold. Our results from the PIC analyses with  
403 controls was also supported by the maximum likelihood, and Bayesian data modeling  
404 approaches. This shows that once proper precautions are taken, the empirical trends do not  
405 depend on the number of selected gene trees or of internal node events included.

406 Empirical support for the ortholog conjecture has been mixed, with some studies  
407 supporting it (Koonin 2005; Studer and Robinson-Rechavi 2009; Altenhoff et al. 2012;  
408 Chen and Zhang 2012; Gabaldón and Koonin 2013; Rogozin et al. 2014; Kryuchkova-  
409 Mostacci and Robinson-Rechavi 2016; Fukushima and Pollock 2020), and a few failing to  
410 do so (Nehrt et al. 2011; Dunn et al. 2018; Stamboulian et al. 2020). Our results provide  
411 additional support for the ortholog conjecture using tissue specificity data in a phylogenetic  
412 framework after controlling for biases. Due to lack of detailed functional information,  
413 many studies are still limited to gene expression data as a proxy of function. Recently,  
414 using functional replaceability assay, experimental studies (Kachroo et al. 2015; Laurent  
415 et al. 2020) have shown that orthologous genes can be swapped between essential yeast  
416 genes and human, although this is rarely the case for all the members of expanded human  
417 gene families (Laurent et al. 2020), validating one prediction of the ortholog conjecture.

418

## 419 **Materials and Methods**

### 420 **Data reproducibility details**

421 Our analyses are based on 21124 gene trees obtained from ENSEMBL Compara v.75  
422 (Herrero et al. 2016) as used by Dunn et al. (2018). We used the same random seed number  
423 as in Dunn et al. (2018) to reproduce the simulation results for reanalysis. All reproduced  
424 data of Dunn et al. were stored in the “manuscript\_dunn.RData” file  
425 (<https://doi.org/10.5281/zenodo.4003391>). We used the results stored in the ‘data’ or  
426 ‘phylo’ slot of the trees for further analyses. To differentiate our own function from theirs  
427 (Dunn et al. 2018), we renamed the original function script of Dunn et al. from  
428 “functions.R” to “functions\_Dunn.R”. We made separate scripts for PIC analyses  
429 (“Premanuscript\_run\_TMRR.R”), and for data modeling analyses (“Model\_fitting.R”).  
430 Some of the analyses were time consuming, so we stored our outputs in  
431 “Analyses\_TMRR.RData”, and in “Model\_fitting\_TMRR.Rdata” files  
432 (<https://doi.org/10.5281/zenodo.4003391>), to load during analyses. All the details of  
433 different functions are provided inside the scripts. We supply all the previously stored data  
434 (to reduce computation time during reproduction of result) and function files including our  
435 own (“functions\_TM\_new.R”) with this manuscript. All scripts are available on GitHub:  
436 [https://github.com/tbegum/Testing\\_the\\_ortholog\\_conjecture](https://github.com/tbegum/Testing_the_ortholog_conjecture).

### 437 **Fixing time calibration bias of duplication nodes**

438 We first present the approach that Dunn et al. (2018) used, for clarity. When two speciation  
439 nodes had the same label in the gene tree, Dunn et al. edited the more recent one to “NA”  
440 rather than “speciation”. Indeed the presence of the same clade names at different node

441 depths forces all the intervening branches to have length zero when the tree is time  
442 calibrated, leading to failure of calibration (Dunn et al. 2018). For trait evolution, they  
443 annotated the tips of these modified trees with precomputed tissue specificity data,  $\tau$  from  
444 8 vertebrate species (human, gorilla, chimpanzee, macaque, mouse, opossum, platypus, and  
445 chicken) (from Kryuchkova-Mostacci and Robinson-Rechavi 2016).  $\tau$  is a univariate index  
446 between 0 and 1 that measures tissue-specificity of gene expression (Yanai et al. 2005):  $\tau$   
447 close to 1 indicates high tissue specificity, while close to 0 indicates more ubiquitous  
448 expression. Here  $\tau$  was computed across 6 tissues: brain, cerebellum, heart, kidney, liver,  
449 and testis, based on the RNA-seq data of Brawand et al. (2011). Dunn et al. pruned the  
450 gene trees to remove tips with missing  $\tau$  data, and then time calibrated them using  
451 speciation clade ages in the `chronos()` function with the ‘correlated’ model from the R  
452 package “ape” (Paradis et al. 2004). The modified NA clades were not used for this  
453 calibration. They used 7 speciation time points with a maximum age of 296 My. Thus they  
454 obtained 8520 calibrated gene trees having at least 4 tips with non-null trait data (Table 1;  
455 Supplementary figs. S4A-S4C). Among these trees, 2990 were pure speciation trees, which  
456 includes 12919 speciation events, or 19% of all speciation nodes.

457 Relative to Dunn et al., we exchanged the order of pruning and time calibration steps, i.e.,  
458 we first time calibrated the 21124 modified (i.e. with NA added) gene trees, followed by  
459 pruning to have at least 4 tips with  $\tau$  data. This makes use of all 32 available speciations  
460 time points, and helps to limit the calibration bias of the old duplication events  
461 (Supplementary figs. S4D-S4F). Calibration fails for some trees, and we obtained 7336  
462 calibrated gene trees. The maximum node age of old duplication events is 1175.2 My for  
463 these trees, as opposed to 11799977 My (older than the universe) for the trees obtained by

464 the original approach (Table 1, Supplementary table S1). Among these 7336 gene trees, we  
465 kept 4288 which have at least 1 speciation and 1 duplication events; we removed 39 pure  
466 duplication and 3009 pure speciation trees. This 4288 gene tree set is our basis for  
467 evaluating phylogenetic methods' capacity to test the ortholog conjecture (Table 1): we  
468 compare the evolutionary rates,  $\sigma^2$ , or PICs of speciation and duplication events of the same  
469 genes.

#### 470 **Model selection for $\tau$ evolution**

471 We followed a state dependent model-fitting approach to identify Brownian motion (BM)  
472 or Ornstein-Uhlenbeck (OU) trees. We classified time-calibrated gene duplication nodes  
473 as “young” ( $\leq 296$  My, the maximum speciation age) or “old” ( $> 296$  My) before model  
474 fitting. We performed stochastic mapping of our gene trees by assigning discrete states  
475 (“speciation”, “young-duplication”, “old-duplication”, and “NA”) to the branches based on  
476 the corresponding ancestral node events using the `simmap()` function of the `phytools` R  
477 package (Revell 2012). For each mapped tree, we fitted 4 different models of  $\tau$  evolution  
478 using maximum-likelihood: (i) BM1, a single Brownian motion rate of evolution (i.e.  
479  $\sigma^2_{\text{speciation}} = \sigma^2_{\text{young-duplication}} = \sigma^2_{\text{old-duplication}}$ ), (ii) BMM, a BM with multiple rates of evolution  
480 for different events (i.e. different  $\sigma^2$  are allowed), (iii) OU1, a single optimum OU model  
481 (i.e.  $\theta_{\text{speciation}} = \theta_{\text{young-duplication}} = \theta_{\text{old-duplication}}$ ,  $\sigma^2_{\text{speciation}} = \sigma^2_{\text{young-duplication}} = \sigma^2_{\text{old-duplication}}$ ,  $\alpha_{\text{speciation}} = \alpha_{\text{young-duplication}} = \alpha_{\text{old-duplication}}$ ), and (iv) OUM, a multi optimum OU model with  
482 identical strength of selection and rate of drift acting on all selective regimes (i.e. like OU1  
483 but  $\theta_{\text{speciation}} \neq \theta_{\text{young-duplication}} \neq \theta_{\text{old-duplication}}$ ).

485 We used both the mvMORPH (Clavel et al. 2015), and OUwie (Beaulieu et al. 2012) R  
486 packages to perform model-fitting. Sometimes the information contained within a tree is  
487 insufficient with respect to the complexity of the fitted models. This can lead to poor model  
488 choice by returning a log-likelihood that is suboptimal and may provide incorrect  
489 estimation of one or more model parameters for that tree (Beaulieu et al. 2012). Hence, we  
490 included the diagnostics (diagnostic=T or diagn=T) during model-fitting. The eigen values  
491 of the Hessian matrix of the diagnostics indicate whether convergence of the model has  
492 been achieved or whether the parameter estimates are reliable (Beaulieu et al. 2012). For  
493 the BM1, BMM, OU1, and OUM models, we first fitted the model using mvMORPH for  
494 each gene tree. If any of the model failed to converge for the tree or if the eigen values of  
495 the Hessian matrix indicated that it was not reliable, we re-fitted that model using OUwie  
496 to include it in model comparison. If still it failed, we removed that model for that tree. For  
497 model comparisons on each gene tree, we calculated the Akaike weights ( $\omega$ ) for each fitted  
498 model by means of the second order Akaike information criteria (AICc), which includes a  
499 correction for small sample sizes (Akaike 1974; Burnham and Anderson 2002). The model  
500 with highest  $\omega$  was selected as the best-supported model of  $\tau$  evolution for the tree  
501 (Burnham and Anderson 2002; Gearty et al. 2018). We estimated model parameters for  
502 each tree based on the best fit model.

### 503 **Bayesian modeling to detect phenotypic optimum shift**

504 Regime shifts, i.e. shifts of optimal  $\tau$  values, in OU models were detected by a Bayesian  
505 phylogenetic approach of the bayou R package (Uyeda and Harmon 2014). The reversible-  
506 jump phylogenetic comparative approach was used to perform MCMC sampling of  
507 locations, magnitudes and numbers of shifts in multiple-optima Ornstein–Uhlenbeck



508 models. We ran MCMC chains for 100000 generations, and the first 30% of samples were  
509 dropped as burn-in. We used a strict threshold of posterior probability  $\geq 0.7$  to detect an  
510 adaptive shift at a given branch of the phylogeny. For each event (“speciation” or  
511 “duplication”), we used a ratio of the number of optimum shifts to the number of branches  
512 for that event to estimate the proportions of shifts in a phylogeny.

### 513 **Randomization test of $\tau$ values**

514 For each tree, we used  $\tau$  data (column name “Tau” in each tree ‘data’ object) across the  
515 tips to carry out our randomization test. To randomize we permuted the actual  $\tau$  data  
516 without altering internal node events. The pic() function of the “ape” package (Paradis et  
517 al. 2004) was used to compute PIC of nodes for each tree using permuted  $\tau$  of tips. For  
518 each run, we compared the contrasts of speciation and duplication events of the whole set  
519 of randomized trees to estimate difference in event contrasts based on Wilcoxon signed  
520 rank test. For 100 runs, we repeated the above process 100 times to obtain a distribution  
521 plot of 100 independent  $P$  values. For our model-fitting approach, we used the same  
522 empirical simmap trees with permuted  $\tau$  data at the tips. We re-estimated the model  
523 parameters of the randomized  $\tau$  trees using the best fit model chosen for the corresponding  
524 empirical gene trees.

### 525 **Randomization test of node events**

526 Some of the speciation nodes had daughters with same clade names in the gene trees we  
527 used for our study. Dunn et al. changed such node events to “NA” to avoid problems during  
528 time calibration of the trees. Such annotated node event information (“Speciation”,  
529 “Duplication”, “NA”) for each tree was available as “Event” in the tree ‘data’ slot. To

530 randomize, we permuted the internal node events (added as column name “event\_new” in  
531 the ‘data’ slot) by maintaining the actual proportion of events for each tree. Then, we used  
532 the PIC of actual  $\tau$  at tips to estimate contrasts difference between newly assigned  
533 speciation and duplication node events by Wilcoxon rank tests. For 100 independent runs,  
534 we repeated the same procedure to obtain 100 independent  $P$  values. Since the internal  
535 node events were changed after such randomization, we reclassified gene duplication nodes  
536 as “young” or “old” on the event modified trees, and repainted the trees. We re-estimated  
537 the model parameters for the discrete states of the randomized events trees using the best  
538 fit model chosen for the corresponding empirical gene trees.

### 539 **Checking for contrasts standardization by diagnostic tests**

540 We used several additional diagnostic tests on those trees to identify adequate independent  
541 nodes contrast standardization before drawing any inference by PIC method, as  
542 recommended in several studies (Garland 1992; Diaz-Uriarte and Garland 1996; Díaz-  
543 Uriarte and Garland 1998; Freckleton and Harvey 2006; Cooper et al. 2016a). The most  
544 usual method for contrasts standardization is to check a correlation between the absolute  
545 values of PICs and their expected standard deviations (i.e. square root of sum of branch  
546 lengths) (Garland et al. 1992; Díaz-Uriarte and Garland 1998; Cooper et al. 2016a). Under  
547 Brownian motion, there should be no correlation. This test and the correlation between the  
548 absolute values of PICs and the logarithm of their node age are model diagnostic plot tests  
549 in the caper (“Comparative Analyses of Phylogenetics and Evolution in R”) package  
550 (Purvis and Rambaut 1995; Cooper et al. 2016a; Orme 2018; R Core Team 2018). We used  
551 both of them by using the “crunch” algorithm of the caper package, which implements the  
552 methods originally provided in CAIC (Purvis and Rambaut 1995; Cooper et al. 2016a;

553 Orme 2018; R Core Team 2018). Correlation of node heights with absolute values of  
554 contrasts or PICs has also been reported to be a reliable indicator of deviation from the  
555 Brownian model (Freckleton and Harvey 2006). Hence, we computed node height for each  
556 node in a tree using the ape package (Paradis et al. 2004). We also used the correlations of  
557 node height and node depth to the absolute value of nodes contrasts to rule out significant  
558 trend in any of the 4 tests. We used  $P < 0.05$  to assess a significant correlation for the  
559 diagnostic tests. A significant trend (positive or negative) indicates phylogenetic  
560 dependence for that tree (Garland 1992; Garland et al. 1992; Díaz-Uriarte and Garland  
561 1998; Freckleton and Harvey 2006; Cooper et al. 2016a), and we removed those trees from  
562 our analysis. Contrast calculation on negative branch lengths is not desirable, so we  
563 removed trees with negative branch lengths before applying the crunch() function. To  
564 assure that nodes contrast standardization is independent of the phylogeny, we considered  
565 sets of trees passing all 4 diagnostic tests for further analyses.

### 566 **Branch length transformation**

567 Transformation of branch lengths has been proposed to restore the performance of PIC  
568 method when the true evolutionary model is not BM or is unknown, or when branch lengths  
569 are in error (Garland et al. 1992; Diaz-Uriarte and Garland 1996; Díaz-Uriarte and Garland  
570 1998). In such cases, branch lengths are transformed by raising a family power of branch  
571 length ranging from 0 to 2 in intervals of 0.1, plus the  $\log_{10}$  of the branch lengths (Diaz-  
572 Uriarte and Garland 1996; Díaz-Uriarte and Garland 1998). For each transformation, the  
573 program computes the correlation between the absolute value of the standardized contrasts  
574 and their standard deviations until no significant correlation is obtained, to ensure adequate  
575 independent contrasts standardization (Diaz-Uriarte and Garland 1996; Díaz-Uriarte and

576 Garland 1998). Finally, we excluded trees for which adequate contrasts standardization is  
577 not achieved even after raising the branch length power to 2 (Diaz-Uriarte and Garland  
578 1996; Diaz-Uriarte and Garland 1998).

### 579 **Details of other packages used in this study**

580 We used `phylosig` function() of the `phytools` package (Revell 2012) to identify trees with  
581 phylogenetic signal ( $P < 0.05$ ) using Blomberg's  $K$  (Blomberg et al. 2003; Münkemüller  
582 et al. 2012; Revell 2012). Analyses and plotting were performed in R version 3.5.1 (R Core  
583 Team 2018) using `treeio` (Guangchuang 2018), `ggtree` (Guangchuang et al. 2017), `stringr`  
584 (Wickham 2019), `digest` (Antoine Lucas et al. 2018), `dplyr` (Wickham et al. 2017),  
585 `tidyverse` (Wickham 2017), `ggrepel` (Slowikowski 2018), `gtools` (Warnes et al. 2018),  
586 `ggplot2` (Wickham 2016), `cowplot` (Wilke 2019), `easyGgplot2` (Kassambara 2014),  
587 `gridExtra` (Auguie 2017), and `png` (Urbanek 2013) libraries.

588

### 589 **Acknowledgements**

590 We sincerely acknowledge Martha Liliano Serranno Serranno for initial help with the  
591 phylogenetic independent contrast method. We thank Nicolas Salamin, Julien Wollbrett,  
592 Jialin Liu, Sebastien Moretti, Sara Fonseca Costa, Kamil Jaron and all the members of the  
593 Robinson-Rechavi group for their help and useful discussions. We also acknowledge  
594 Cassey Dunn for his initial help in reproducing their results. Parts of the computations were  
595 performed at the Vital-IT (<http://www.vital-it.ch>) Center for high-performance computing  
596 of the SIB Swiss Institute of Bioinformatics.

## 597 **References**

598 Akaike H. 1974. New look at statistical-model identification. *Automatic Control, IEEE*  
599 *Transactions on* 19:716–723.

600 Altenhoff AM, Studer RA, Robinson-Rechavi M, Dessimoz C. 2012. Resolving the  
601 ortholog conjecture: Orthologs tend to be weakly, but significantly, more similar in  
602 function than paralogs. *PLoS Comput Biol* 8:e1002514. Available from:  
603 <https://www.ncbi.nlm.nih.gov/pubmed/22615551>

604 Antoine Lucas DE with contributions by, Tuszynski J, Bengtsson H, Urbanek S, Frasca M,  
605 Lewis B, Stokely M, Muehleisen H, Murdoch D, Hester J, et al. 2018. Digest: Create  
606 compact hash digests of r objects. Available from: [https://CRAN.R-](https://CRAN.R-project.org/package=digest)  
607 [project.org/package=digest](https://CRAN.R-project.org/package=digest)

608 Auguie B. 2017. GridExtra: Miscellaneous functions for “grid” graphics. Available from:  
609 <https://CRAN.R-project.org/package=gridExtra>

610 Beaulieu JM, Jhvueng DC, Boettiger C, O’Meara BC. 2012. Modeling stabilizing  
611 selection: Expanding the Ornstein-Uhlenbeck model of adaptive evolution. *Evolution*  
612 66:2369–2383. Available from: <https://www.ncbi.nlm.nih.gov/pubmed/22834738>

613 Benjamini Y, Yekutieli D. 2005. Quantitative trait loci analysis using the false discovery  
614 rate. *Genetics* 171:783–790. Available from:  
615 <https://www.ncbi.nlm.nih.gov/pubmed/15956674>

616 Blomberg SP, Garland T, Ives AR. 2003. Testing for phylogenetic signal in comparative  
617 data: Behavioral traits are more labile. *Evolution* 57:717–745. Available from:  
618 <https://www.ncbi.nlm.nih.gov/pubmed/12778543>

619 Brawand D, Soumillon M, Necsulea A, Julien P, Csárdi G, Harrigan P, Weier M, Liechti  
620 A, Aximu-Petri A, Kircher M, et al. 2011. The evolution of gene expression levels in  
621 mammalian organs. *Nature* 478:343–348. Available from:  
622 <https://www.ncbi.nlm.nih.gov/pubmed/22012392>

623 Burnham K, Anderson D. 2002. Model selection and multimodel inference. In: Springer,  
624 New York,

625 Butler MA, King AA. 2004. Phylogenetic comparative analysis: a modeling approach for  
626 adaptive evolution. *Am Nat* 164:683-695. Available from:  
627 <https://www.ncbi.nlm.nih.gov/pubmed/29641928>

628 Catalán A, Briscoe AD, Höhna, S. 2019. Drift and directional selection are the evolutionary  
629 forces driving gene expression divergence in eye and brain tissue of. *Genetics* 213:581-  
630 594. Available from: <https://www.ncbi.nlm.nih.gov/pubmed/31467133>

631 Chen J, Swofford R, Johnson J, Cummings BB, Rogel N, Lindblad-Toh K, Haerty W,  
632 Palma FD, Regev A. 2019. A quantitative framework for characterizing the evolutionary  
633 history of mammalian gene expression. *Genome Res* 29:53–63. Available from:  
634 <https://www.ncbi.nlm.nih.gov/pubmed/30552105>

- 635 Chen X, Zhang J. 2012. The ortholog conjecture is untestable by the current gene ontology  
636 but is supported by rna sequencing data. PLoS Comput Biol 8:e1002784. Available from:  
637 <https://www.ncbi.nlm.nih.gov/pubmed/23209392>
- 638 Clavel J, Escarguel G, Merceron G. 2015. mvMORPH: An R package for fitting  
639 multivariate evolutionary models to morphometric data. Methods Ecol Evol 6:1311–1319.
- 640 Conant GC, Wagner A. 2003. Asymmetric sequence divergence of duplicate genes.  
641 Genome Res 13:2052–2058. Available from:  
642 <https://www.ncbi.nlm.nih.gov/pubmed/12952876>
- 643 Cooper N, Thomas GH, FitzJohn RG. 2016a. Shedding light on the 'dark side' of  
644 phylogenetic comparative methods. Methods Ecol Evol 7:693–699. Available from:  
645 <https://www.ncbi.nlm.nih.gov/pubmed/27499839>
- 646 Cooper N, Thomas GH, Venditti C, Meade A, Freckleton RP. 2016b. A cautionary note on  
647 the use of ornstein uhlenbeck models in macroevolutionary studies. Biol J Linn Soc Lond  
648 118:64–77. Available from: <https://www.ncbi.nlm.nih.gov/pubmed/27478249>
- 649 Cornwell W, Nakagawa S. 2017. Phylogenetic comparative methods. Curr Biol 27:R333–  
650 R336. Available from: <https://www.ncbi.nlm.nih.gov/pubmed/28486113>
- 651 Diaz-Uriarte R, Garland T. 1996. Testing hypotheses of correlated evolution using  
652 phylogenetically independent contrasts: Sensitivity to deviations from brownian motion.  
653 Syst Biol 45:27–47.

- 654 Díaz-Uriarte R, Garland T. 1998. Effects of branch length errors on the performance of  
655 phylogenetically independent contrasts. *Syst Biol* 47:654–672. Available from:  
656 <https://www.ncbi.nlm.nih.gov/pubmed/12066309>
- 657 Dunn CW, Zapata F, Munro C, Siebert S, Hejnal A. 2018. Pairwise comparisons across  
658 species are problematic when analyzing functional genomic data. *Proc Natl Acad Sci U S*  
659 *A* 115:E409–E417. Available from: <https://www.ncbi.nlm.nih.gov/pubmed/29301966>
- 660 Eastman JM, Alfaro ME, Joyce P, Hipp AL, Harmon LJ. 2011. A novel comparative  
661 method for identifying shifts in the rate of character evolution on trees. *Evolution* 65:3578–  
662 3589. Available from: <https://www.ncbi.nlm.nih.gov/pubmed/22133227>
- 663 Eng KH, Bravo HC, Keleş S. 2009. A phylogenetic mixture model for the evolution of  
664 gene expression. *Mol Biol Evol* 26:2363–2372. Available from:  
665 <https://www.ncbi.nlm.nih.gov/pubmed/19602540>
- 666 Felsenstein J. 1985. Phylogenies and the comparative method. *Am Nat* 125:1–15.  
667 Available from: <https://www.jstor.org/stable/2461605>
- 668 Freckleton R. 2000. Phylogenetic tests of ecological and evolutionary hypotheses:  
669 Checking for phylogenetic independence. *Func Ecol* 14:129–134.
- 670 Freckleton R, Harvey P, Pagel M. 2002. Phylogenetic analysis and comparative data: A  
671 test and review of evidence. *Am Nat* 160:712–726.
- 672 Freckleton RP, Harvey PH. 2006. Detecting non-brownian trait evolution in adaptive  
673 radiations. *PLoS Biol* 4:e373. Available from:  
674 <https://www.ncbi.nlm.nih.gov/pubmed/17090217>



- 675 Fukushima K, Pollock DD. 2020. Organ-specific propensity drives patterns of gene  
676 expression evolution. *BioRxiv*. doi: <https://doi.org/10.1101/409888>
- 677 Gabaldón T, Koonin EV. 2013. Functional and evolutionary implications of gene  
678 orthology. *Nat Rev Genet* 14:360–366. Available from:  
679 <https://www.ncbi.nlm.nih.gov/pubmed/23552219>
- 680 Garland T. 1992. Rate tests for phenotypic evolution using phylogenetically independent  
681 contrasts. *Am Nat* 140:509–519. Available from:  
682 <https://www.ncbi.nlm.nih.gov/pubmed/19426053>
- 683 Garland TJ, Harvey P, Ives A. 1992. Procedure for the analysis of comparative data using  
684 phylogenetically independent contrasts. *Syst Biol* 41:18–32.
- 685 Gearty W, McClain CR, Payne JL. 2018. Energetic tradeoffs control the size distribution  
686 of aquatic mammals. *Proc Natl Acad Sci U S A* 115:4194–4199. Available from:  
687 <https://www.ncbi.nlm.nih.gov/pubmed/29581289>
- 688 Grafen A. 1989. The phylogenetic regression. *Philos Trans R Soc Lond B Biol Sci*  
689 326:119–157. Available from: <https://www.ncbi.nlm.nih.gov/pubmed/2575770>
- 690 Guangchuang Y. 2018. Treeio: Base classes and functions for phylogenetic tree input and  
691 output. Available from: <https://guangchuangyu.github.io/software/treeio>
- 692 Guangchuang Y, David S, Huachen Z, Yi G, Tommy T-YL. 2017. Ggtree: An R package  
693 for visualization and annotation of phylogenetic trees with their covariates and other  
694 associated data. *Methods Ecol Evol* 8:28–36.

- 695 Han MV, Demuth JP, McGrath CL, Casola C, Hahn MW. 2009. Adaptive evolution of  
696 young gene duplicates in mammals. *Genome Res* 19:859–867. Available from:  
697 <https://www.ncbi.nlm.nih.gov/pubmed/19411603>
- 698 Hansen TF. 1997. Stabilizing selection and the comparative analysis of adaptation.  
699 *Evolution* 51:1341–1351. Available from:  
700 <https://www.ncbi.nlm.nih.gov/pubmed/28568616>
- 701 Herrero J, Muffato M, Beal K, Fitzgerald S, Gordon L, Pignatelli M, Vilella AJ, Searle  
702 SM, Amode R, Brent S, et al. 2016. Ensembl comparative genomics resources. Database.  
703 Available from: <https://www.ncbi.nlm.nih.gov/pubmed/27141089>
- 704 Hochberg Y, Benjamini Y. 1990. More powerful procedures for multiple significance  
705 testing. *Stat Med* 9:811–818. Available from:  
706 <https://www.ncbi.nlm.nih.gov/pubmed/2218183>
- 707 Holland PW, Marlétaz F, Maeso I, Dunwell TL, Paps J. 2017. New genes from old:  
708 Asymmetric divergence of gene duplicates and the evolution of development. *Philos Trans  
709 R Soc Lond B Biol Sci* 372. Available from:  
710 <https://www.ncbi.nlm.nih.gov/pubmed/27994121>
- 711 Kachroo AH, Laurent JM, Yellman CM, Meyer AG, Wilke CO, Marcotte EM. 2015.  
712 Evolution. systematic humanization of yeast genes reveals conserved functions and genetic  
713 modularity. *Science* 348:921–925. Available from:  
714 <https://www.ncbi.nlm.nih.gov/pubmed/25999509>

- 715 Kassambara A. 2014. EasyGgplot2: Perform and customize easily a plot with ggplot2.  
716 Available from: <http://www.sthda.com>
- 717 Khabbazian M, Kriebel R, Rohe K, Ané C. 2016. Fast and accurate detection of  
718 evolutionary shifts in ornstein-uhlenbeck models. *Methods Ecol Evol* 7:811–824.
- 719 Kim SH, Yi SV. 2006. Correlated asymmetry of sequence and functional divergence  
720 between duplicate proteins of *saccharomyces cerevisiae*. *Mol Biol Evol* 23:1068–1075.  
721 Available from: <https://www.ncbi.nlm.nih.gov/pubmed/16510556>
- 722 Koonin EV. 2005. Orthologs, paralogs, and evolutionary genomics. *Annu Rev Genet*  
723 39:309–338. Available from: <https://www.ncbi.nlm.nih.gov/pubmed/16285863>
- 724 Kryuchkova-Mostacci N, Robinson-Rechavi M. 2016. Tissue-specificity of gene  
725 expression diverges slowly between orthologs, and rapidly between paralogs. *PLoS*  
726 *Comput Biol* 12:e1005274. Available from:  
727 <https://www.ncbi.nlm.nih.gov/pubmed/28030541>
- 728 Laurent JM, Garge RK, Teufel AI, Wilke CO, Kachroo AH, Marcotte EM. 2020.  
729 Humanization of yeast genes with multiple human orthologs reveals functional divergence  
730 between paralogs. *PLoS Biol* 18:e3000627. Available from:  
731 <https://www.ncbi.nlm.nih.gov/pubmed/32421706>
- 732 Martins E, Hansen T. 1997. Phylogenies and the comparative method: A general approach  
733 to incorporating phylogenetic information into the analysis of interspecific data. *Am Nat*  
734 149:646–667.

- 735 Molina-Venegas R, Rodríguez M. 2017. Revisiting phylogenetic signal; strong or  
736 negligible impacts of polytomies and branch length information? BMC Evol Biol 17:53.  
737 Available from: <https://www.ncbi.nlm.nih.gov/pubmed/28201989>
- 738 Münkemüller T, Lavergne S, Bzeznik B, Dray S, Jombart T, Schiffrers K, Thuiller W. 2012.  
739 How to measure and test phylogenetic signal. Methods Ecol Evol 3:743–756.
- 740 Nehrt NL, Clark WT, Radivojac P, Hahn MW. 2011. Testing the ortholog conjecture with  
741 comparative functional genomic data from mammals. PLoS Comput Biol 7:e1002073.  
742 Available from: <https://www.ncbi.nlm.nih.gov/pubmed/21695233>
- 743 Oakley TH, Gu Z, Abouheif E, Patel NH, Li WH. 2005. Comparative methods for the  
744 analysis of gene-expression evolution: An example using yeast functional genomic data.  
745 Mol Biol Evol 22:40–50. Available from:  
746 <https://www.ncbi.nlm.nih.gov/pubmed/15356281>
- 747 Oakley TH, Ostman B, Wilson AC. 2006. Repression and loss of gene expression outpaces  
748 activation and gain in recently duplicated fly genes. Proc Natl Acad Sci U S A 103:11637–  
749 11641. Available from: <https://www.ncbi.nlm.nih.gov/pubmed/16864793>
- 750 O’Meara BC, Ané C, Sanderson MJ, Wainwright PC. 2006. Testing for different rates of  
751 continuous trait evolution using likelihood. Evolution 60:922–933. Available from:  
752 <https://www.ncbi.nlm.nih.gov/pubmed/16817533>
- 753 Orme D. 2018. The caper package: Comparative analysis of phylogenetics and evolution  
754 in R. Available from: <https://cran.r-project.org/web/packages/caper/vignettes/caper.pdf>

- 755 Pagel M. 1999. Inferring the historical patterns of biological evolution. *Nature* 401:877–  
756 884.
- 757 Panchin AY, Gelfand MS, Ramensky VE, Artamonova II. 2010. Asymmetric and non-  
758 uniform evolution of recently duplicated human genes. *Biol Direct* 5:54. Available from:  
759 <https://www.ncbi.nlm.nih.gov/pubmed/20825637>
- 760 Paradis E, Claude J, Strimmer K. 2004. APE: Analyses of phylogenetics and evolution in  
761 R language. *Bioinformatics* 20:289–290. Available from:  
762 <https://www.ncbi.nlm.nih.gov/pubmed/14734327>
- 763 Pegueroles C, Laurie S, Albà MM. 2013. Accelerated evolution after gene duplication: A  
764 time-dependent process affecting just one copy. *Mol Biol Evol* 30:1830–1842. Available  
765 from: <https://www.ncbi.nlm.nih.gov/pubmed/23625888>
- 766 Pennell MW, Eastman JM, Slater GJ, Brown JW, Uyeda JC, FitzJohn RG, Alfaro ME,  
767 Harmon LJ. 2014. Geiger v2.0: An expanded suite of methods for fitting  
768 macroevolutionary models to phylogenetic trees. *Bioinformatics* 30:2216–2218. Available  
769 from: <https://www.ncbi.nlm.nih.gov/pubmed/24728855>
- 770 Pich I Roselló O, Kondrashov FA. 2014. Long-term asymmetrical acceleration of protein  
771 evolution after gene duplication. *Genome Biol Evol* 6:1949–1955. Available from:  
772 <https://www.ncbi.nlm.nih.gov/pubmed/25070510>
- 773 Purvis A, Rambaut A. 1995. Comparative analysis by independent contrasts (caic): An  
774 apple macintosh application for analysing comparative data. *Comput Appl Biosci* 11:247–  
775 251. Available from: <https://www.ncbi.nlm.nih.gov/pubmed/7583692>

- 776 R Core Team. 2018. R: A language and environment for statistical computing. Vienna,  
777 Austria: R Foundation for Statistical Computing Available from: [https://www.R-](https://www.R-project.org/)  
778 [project.org/](https://www.R-project.org/)
- 779 Revell LJ. 2012. Phytools: An R package for phylogenetic comparative biology (and other  
780 things). *Methods Ecol Evol* 3:217–223.
- 781 Rogozin IB, Managadze D, Shabalina SA, Koonin EV. 2014. Gene family level  
782 comparative analysis of gene expression in mammals validates the ortholog conjecture.  
783 *Genome Biol Evol* 6:754–762. Available from:  
784 <https://www.ncbi.nlm.nih.gov/pubmed/24610837>
- 785 Rohlf FJ. 2001. Comparative methods for the analysis of continuous variables: Geometric  
786 interpretations. *Evolution* 55:2143–2160. Available from:  
787 <https://www.ncbi.nlm.nih.gov/pubmed/11794776>
- 788 Rohlf RV, Nielsen R. 2015. Phylogenetic ANOVA: The expression variance and  
789 evolution model for quantitative trait evolution. *Syst Biol* 64:695–708. Available from:  
790 <https://www.ncbi.nlm.nih.gov/pubmed/26169525>
- 791 Sanderson MJ. 2002. Estimating absolute rates of molecular evolution and divergence  
792 times: A penalized likelihood approach. *Mol Biol Evol* 19:101–109. Available from:  
793 <https://www.ncbi.nlm.nih.gov/pubmed/11752195>
- 794 Scannell DR, Wolfe KH. 2008. A burst of protein sequence evolution and a prolonged  
795 period of asymmetric evolution follow gene duplication in yeast. *Genome Res* 18:137–147.  
796 Available from: <https://www.ncbi.nlm.nih.gov/pubmed/18025270>

- 797 Slowikowski K. 2018. Ggrepel: Automatically position non-overlapping text labels with  
798 'ggplot2'. Available from: <https://CRAN.R-project.org/package=ggrepel>
- 799 Sonnhammer EL, Gabaldón T, Sousa da Silva AW, Martin M, Robinson-Rechavi M,  
800 Boeckmann B, Thomas PD, Dessimoz C, consortium Q for O. 2014. Big data and other  
801 challenges in the quest for orthologs. *Bioinformatics* 30:2993–2998. Available from:  
802 <https://www.ncbi.nlm.nih.gov/pubmed/25064571>
- 803 Stambouliau M, Guerrero RF, Hahn MW, Radivojac P. 2020. The ortholog conjecture  
804 revisited: The value of orthologs and paralogs in function prediction. *Bioinformatics*  
805 36:i219–i226. Available from: <https://www.ncbi.nlm.nih.gov/pubmed/32657391>
- 806 Studer RA, Robinson-Rechavi M. 2009. How confident can we be that orthologs are  
807 similar, but paralogs differ? *Trends Genet* 25:210–216. Available from:  
808 <https://www.ncbi.nlm.nih.gov/pubmed/19368988>
- 809 Thomas GH, Freckleton RP, Székely T. 2006. Comparative analyses of the influence of  
810 developmental mode on phenotypic diversification rates in shorebirds. *Proc Biol Sci*  
811 273:1619–1624. Available from: <https://www.ncbi.nlm.nih.gov/pubmed/16769632>
- 812 Urbanek S. 2013. Png: Read and write png images. Available from: [https://CRAN.R-](https://CRAN.R-project.org/package=png)  
813 [project.org/package=png](https://CRAN.R-project.org/package=png)
- 814 Uyeda JC, Harmon LJ. 2014. A novel bayesian method for inferring and interpreting the  
815 dynamics of adaptive landscapes from phylogenetic comparative data. *Syst Biol* 63:902–  
816 918. Available from: <https://www.ncbi.nlm.nih.gov/pubmed/25077513>

817 Uyeda JC, Pennell MW, Miller ET, Maia R, McClain CR. 2017. The evolution of energetic  
818 scaling across the vertebrate tree of life. *Am Nat* 190:185–199. Available from:  
819 <https://www.ncbi.nlm.nih.gov/pubmed/28731792>

820 Warnes GR, Bolker B, Lumley T. 2018. Gtools: Various R programming tools. Available  
821 from: <https://CRAN.R-project.org/package=gtools>

822 Wickham H. 2016. Ggplot2: Elegant graphics for data analysis. Springer-Verlag New York  
823 Available from: <https://ggplot2.tidyverse.org>

824 Wickham H. 2017. Tidyverse: Easily install and load the 'tidyverse'. Available from:  
825 <https://CRAN.R-project.org/package=tidyverse>

826 Wickham H. 2019. Stringr: Simple, consistent wrappers for common string operations.  
827 Available from: <https://CRAN.R-project.org/package=stringr>

828 Wickham H, Francois R, Henry L, Müller K. 2017. dplyr: A grammar of data manipulation.  
829 Available from: <https://CRAN.R-project.org/package=dplyr>

830 Wilke CO. 2019. Cowplot: Streamlined plot theme and plot annotations for 'ggplot2'.  
831 Available from: <https://CRAN.R-project.org/package=cowplot>

832 Yanai I, Benjamin H, Shmoish M, Chalifa-Caspi V, Shklar M, Ophir R, Bar-Even A, Horn-  
833 Saban S, Safran M, Domany E, et al. 2005. Genome-wide midrange transcription profiles  
834 reveal expression level relationships in human tissue specification. *Bioinformatics* 21:650–  
835 659. Available from: <Go to ISI>://WOS:000227241200012

836



## 837 **Figure captions**

838 **Figure 1: Reanalyses of phylogenetic simulation data of Dunn et al. (2018).** *P* values  
839 are from Wilcoxon two-tailed tests. Values inside boxplots denote median PIC values of  
840 the corresponding events. In null simulations, there should be no difference in contrasts  
841 between events. In OC (Ortholog Conjecture) simulations, contrasts are expected to be  
842 higher for duplication than for speciation. (A) Higher contrasts for speciation than  
843 duplication reject the null hypothesis under null simulation scenario for all empirical time  
844 calibrated gene trees. (B) Results are similar with a subset of trees with strong phylogenetic  
845 signal for  $\tau$ .

846 **Figure 2: Analyses on calibrated empirical gene trees of Dunn et al. (2018).** *P* values  
847 are from Wilcoxon two-tailed tests. (A) Randomly shuffling the  $\tau$  values of the tips for  
848 8520 gene trees does not alter the empirical trend of an opposite trend to the ortholog  
849 conjecture. (B) The expected variance is much higher for duplication than speciation events  
850 irrespective of the number of tips considered for the study. (C) Using the original  $\tau$  data, if  
851 we permute the events (Speciation or Duplication or NA) of the nodes, the trend of result  
852 remains. (D) The proportions of speciation events is much higher than duplication events  
853 for all time-calibrated trees; the dotted line represents the median proportion of both events;  
854 a high proportion of trees have no duplication events.

855 **Figure 3: The ortholog conjecture test on  $\tau$  for trees passing diagnostic plot tests.** *P*  
856 values are from Wilcoxon two-tailed tests. Values inside boxplots denote median PIC  
857 values of the corresponding events. Young duplicates: age  $\leq$  296 My, the maximum  
858 speciation age; old duplicates: age  $>$  296 My.

859 **Figure 4: The ortholog conjecture test for contrasts standardized branch transformed**  
860 **trees.** *P* values are from Wilcoxon two-tailed tests. Values inside boxplots denote median  
861 PIC value of the corresponding event. (A) Using 4190 out of 4288 calibrated trees that  
862 passed diagnostic tests following branch length transformation. (B) Permuting  $\tau$ , and (C)  
863 permuting internal events on contrasts standardized branch length transformed trees  
864 produces distinct patterns compared to the empirical gene trees of (A).

865

866 **Table 1: Information on different tree sets, number of internal node events, and node**  
 867 **ages used in this reanalysis.**

| <b>Datasets</b>                                     | <b>Number of trees</b> | <b>Number of speciation events</b> | <b>Number of duplication events</b> | <b>Number of NA events</b> | <b>Maximum speciation node age (My)</b> | <b>Maximum duplication node age (My)</b> |
|-----------------------------------------------------|------------------------|------------------------------------|-------------------------------------|----------------------------|-----------------------------------------|------------------------------------------|
| Dunn et al.: full set                               | 8520                   | 67911                              | 21071                               | 26794                      | 296                                     | 11799977                                 |
| Dunn et al.: trees with strong phylogenetic signals | 2082                   | 13118                              | 4056                                | 5186                       | 296                                     | 1342                                     |
| This study: after excluding pure speciation trees   | 4288                   | 38882                              | 15274<br>(8556 young +<br>6718 old) | 15201                      | 296                                     | 1175                                     |

868 *Note-* My: Million years; young: age  $\leq$  296 My; old: age  $>$  296 My.

869 **Table 2: Summary statistics on 1101 OUM trees passing a posterior probability cutoff**  
 870 **of  $\geq 0.7$  in a Bayesian framework.**

| Duplication<br>Age | Proportions of regime shifts per branch |                   | Paired two-sided<br>Wilcoxon rank sum test | Regime shift rates (shifts/My) |                   | Two-sided<br>Wilcoxon rank test |
|--------------------|-----------------------------------------|-------------------|--------------------------------------------|--------------------------------|-------------------|---------------------------------|
|                    | After speciation                        | After duplication |                                            | After speciation               | After duplication |                                 |
| Young              | 3.1%                                    | 4.5%              | $3.4e^{-12}$                               | 0.013                          | 0.031             | $1.7e^{-11}$                    |
| Old                | 2.6%                                    | 10%               | $< 2.2e^{-16}$                             | 0.013                          | 0.0023            | $< 2.2e^{-16}$                  |

871 *Note-* Above analyses include 13824 speciation, 3027 young and 2814 old duplication  
 872 events. Values shown in the table indicate median values. The difference in proportions of  
 873 regime shifts per branch after speciation events for two types of duplications is due to the  
 874 different sets of trees used. Few trees shared both types of duplicates. Proportions of regime  
 875 shifts per branch of events is estimated for each tree, and thus paired Wilcoxon test is used  
 876 to compare the difference. A single gene tree can have multiple optima shift rates for  
 877 events, and thus two-sided Wilcoxon rank test was used for comparison.

878

879

880 **Table 3: Summary statistics for Brownian trees.**

| Duplication age | Data                                                                                         | $\sigma^2_{\text{Speciation}}$ | $\sigma^2_{\text{Duplication}}$ | $\frac{\sigma^2_{\text{Duplication}}}{\sigma^2_{\text{Speciation}}}$ | <i>P</i> -value |
|-----------------|----------------------------------------------------------------------------------------------|--------------------------------|---------------------------------|----------------------------------------------------------------------|-----------------|
| Young           | Empirical<br>( $n_{\text{Speciation}} = 4642$ ;<br>$n_{\text{Duplication}} = 1742$ )         | $9e^{-5}$                      | $1.4e^{-4}$                     | 1.5                                                                  | $5e^{-12}$      |
|                 | Randomized $\tau$<br>( $n_{\text{Speciation}} = 4618$ ;<br>$n_{\text{Duplication}} = 1723$ ) | $6.9e^{-4}$                    | $2.2e^{-4}$                     | 0.32                                                                 | $1.4e^{-13}$    |
|                 | Randomized events<br>( $n_{\text{Speciation}} = 3215$ ;<br>$n_{\text{Duplication}} = 1438$ ) | $1.7e^{-4}$                    | $8.5e^{-5}$                     | 0.5                                                                  | 0.02            |
| Old             | Empirical<br>( $n_{\text{Speciation}} = 5356$ ;<br>$n_{\text{Duplication}} = 1295$ )         | $1.7e^{-4}$                    | $2e^{-9}$                       | $1.2e^{-5}$                                                          | $< 2.2e^{-16}$  |
|                 | Randomized $\tau$<br>( $n_{\text{Speciation}} = 5337$ ;<br>$n_{\text{Duplication}} = 1291$ ) | $9.1e^{-4}$                    | $2.5e^{-10}$                    | $2.7e^{-7}$                                                          | $< 2.2e^{-16}$  |
|                 | Randomized events<br>( $n_{\text{Speciation}} = 2788$ ;<br>$n_{\text{Duplication}} = 800$ )  | $1.8e^{-4}$                    | $2.1e^{-9}$                     | $1.2e^{-5}$                                                          | $< 2.2e^{-16}$  |

881 *Note:* Median values of  $\sigma^2$  are shown. *P*-value from paired two-sided Wilcoxon test.

882

## 883 **Supporting Information**

884

885 **Figure S1: Expectations from phylogenetic and pairwise comparison approaches**  
886 **under null and ortholog conjecture scenarios.** PIC: Phylogenetic Independent Contrast,  
887 OC: Ortholog Conjecture. We present 4 time-calibrated gene trees of Dunn et al. (2018) as  
888 illustration. Trees A and B are well calibrated, with the duplication ages are constrained by  
889 speciation ages, as shown by the time scales below each phylogeny. Trees C and D  
890 represent biased calibrated trees, where old duplication branches are inaccurately calibrated  
891 due to lack of age constraints. To evaluate the impacts of gene duplication and speciation  
892 events in trait evolution, pairwise comparisons do not rely on the branch lengths of a  
893 calibrated phylogeny, but phylogenetic methods do. If time calibration of old duplication  
894 nodes has no influence in the inference of phylogenetic approaches, we expect to obtain  
895 patterns under a null and OC scenarios as shown in the right part of the figure. This means  
896 that the phylogenetic contrasts or pairwise correlations of different events should be drawn  
897 from the same distribution under a null model, while the expectation differs under the OC  
898 model. We used 2 times higher rates of trait evolution ( $\tau$  here) following duplications than  
899 speciations (i.e.  $\sigma^2_{\text{duplication}} = 2 * \sigma^2_{\text{speciation}}$ ) in this example for the OC model.

900 **Figure S2.: Repeating simulations on all calibrated trees with different random seed**  
901 **number.** *P* values are from Wilcoxon two-tailed tests. Simulations with different seed  
902 number did not change the trend of results as reported in Fig. 1A.

903 **Figure S3: Simulation analyses on 1135 trees with strong phylogenetic signals.** *P*  
904 values are from Wilcoxon two-tailed tests. Dunn et al. used a cutoff of  $K > 0.551$  to identify

905 trees with strong phylogenetic signals. However, trees with higher K statistic can have  
906 corresponding  $P$  values which are non-significant. Considering both K statistic and  $P$  value,  
907 we found similar trends as was observed with 2082 trees.

908 **Figure S4: Difference between time calibration approaches of Dunn et al. (2018) and**

909 **of this study.** In this example, we used the phylogeny of ACP1 gene. The top panel (A-C)

910 shows the steps used by Dunn et al. (2018), while the bottom panel (D-F) shows the steps

911 used in this study. Gene trees obtained from Ensembl (Herrero et al. 2016) have branch

912 lengths in substitutions per site. (A) and (D) are the same gene tree, where Dunn et al.

913 (2018) edited few speciation events to ‘NA’ to pass the time calibration step. (B) The gene

914 trees are pruned to species with available  $\tau$ . (C) The pruned tree is time calibrated using

915 speciation time points. Pruning before time calibration produces tree with many

916 duplications, and NA nodes older to the oldest speciation nodes as in (B). This leads to

917 using only 7 speciation time points for calibration. Due to unavailable age constraints on

918 the old duplication nodes, the time scale of the phylogeny in (C) reaches 880 million years

919 (My). When we performed time calibration before pruning as in (E), we could use 32

920 speciation nodes for time calibration. This means that we could use many speciation nodes

921 for time calibration, although  $\tau$  data was unavailable for species at tips due to the choice of

922 species in this study. Hence, the old duplication nodes are constrained by the age of

923 speciation nodes older to them, and thus the maximum age is now of 356 My (F).

924 **Figure S5: Re-analyses of expected variances of calibrated trees considered by Dunn**

925 **et al.** The expected variance plots of (A) all 8520 calibrated trees, and (B) 2082 trees with

926 strong phylogenetic signal. The dotted line represents the mean expected variance of the

927 events. These plots show why duplication nodes preceding ancient speciation nodes can be  
928 problematic for PIC.

929 **Figure S6: *P* value distribution plots after 100 independent runs on each set of trees.**

930 Wilcoxon two-tailed test with 95% confidence interval was used to compare the speciation  
931 and duplication contrasts after randomization tests. (A) and (B) applied to trees with at least  
932 one speciation and one duplication event. (C) and (D) applied to trees with strong  
933 phylogenetic signal. (A) and (C) randomization of trait ( $\tau$ ) over the trees. (B) and (D)  
934 randomization of internal node events. The inset plots show *P* values adjusted with  
935 Benjamini-Hochberg (Benjamini and Yekutieli 2005; Hochberg and Benjamini 1990).  
936 Supporting our observations of Figs. 2A and 2C, all the plots confirm that the empirical  
937 result of Dunn et al. (2018) is not different from randomized test results.

938 **Figure S7: The ortholog conjecture test after randomizations of contrasts**

939 **standardized trees.** *P* values are from Wilcoxon two-tailed tests. ‘PICs’: Phylogenetic  
940 Independent Contrasts. Values inside boxplots denote median PIC value of the  
941 corresponding event. (A-B) Plots after randomizing  $\tau$ , and after randomizing events using  
942 the same trees as in Fig. 3.

943 **Figure S8: Multivariate model fitting result using a maximum likelihood framework.**

944 BM1: Single rate Brownian; BMM: Multi rates Brownian; OU1: Single optimum Ornstein-  
945 Uhlenbeck; and OUM: Multi optima Ornstein-Uhlenbeck models.

946 **Figure S9: The ortholog conjecture test for  $\tau$  on calibrated trees of Dunn et al.** *P* values

947 are from Wilcoxon two-tailed tests. ‘PICs’: Phylogenetic Independent Contrasts. Values  
948 inside boxplots denote median PIC value of the corresponding event. (A) Using 8417 out  
949 of 8520 calibrated trees that passed diagnostic tests following branch length transformation.



950 (B) Plot after randomizing  $\tau$ , and (C) after randomizing events using the same branch  
951 transformed trees as in (A).

952 **Figure S10: The ortholog conjecture test for  $\tau$  on branch transformed trees with**  
953 **strong phylogenetic signals.** *P* value are from Wilcoxon two-tailed tests. ‘PICs’:  
954 Phylogenetic Independent Contrasts. Values inside boxplots denote median PIC value of  
955 the corresponding event. (A) using 2080 out of 2082 calibrated trees that passed diagnostic  
956 tests following branch length transformation. (B) Plot after randomizing  $\tau$ , and (C) after  
957 randomizing events using the same branch transformed trees as in (A).

958

959 **Table S1: Summary statistics of calibrated old duplication nodes for 8420 trees of**  
960 **Dunn et al. (2018).**

| <b>Maximum age group in<br/>Million Years (My)</b> | <b>Count</b> |
|----------------------------------------------------|--------------|
| 296-500                                            | 2917         |
| 501-900                                            | 7548         |
| 901-3000                                           | 49           |
| 3001-10000                                         | 16           |
| 10001-11799977                                     | 9            |

961

962

963 **Table S2: Analyses on multi optima OU trees.**

| Duplication age | Data                                                                                        | $\theta_{\text{Speciation}}$ | $\theta_{\text{Duplication}}$ | $\theta_{\text{Duplication}} / \theta_{\text{Speciation}}$ | <i>P</i> -value |
|-----------------|---------------------------------------------------------------------------------------------|------------------------------|-------------------------------|------------------------------------------------------------|-----------------|
| Young           | Empirical<br>( $n_{\text{Speciation}} = 2690$ ;<br>$n_{\text{Duplication}} = 842$ )         | 0.41                         | 0.74                          | 1.8                                                        | $8.6e^{-10}$    |
|                 | Randomized $\tau$<br>( $n_{\text{Speciation}} = 2690$ ;<br>$n_{\text{Duplication}} = 842$ ) | 0.53                         | 0.55                          | 1.03                                                       | 0.97            |
|                 | Randomized events<br>( $n_{\text{Speciation}} = 1872$ ;<br>$n_{\text{Duplication}} = 698$ ) | 0.50                         | 0.53                          | 1.06                                                       | 0.75            |
| Old             | Empirical<br>( $n_{\text{Speciation}} = 4152$ ;<br>$n_{\text{Duplication}} = 847$ )         | 0.42                         | 0.92                          | 2.19                                                       | $2.4e^{-4}$     |
|                 | Randomized $\tau$<br>( $n_{\text{Speciation}} = 4152$ ;<br>$n_{\text{Duplication}} = 847$ ) | 0.54                         | $1.5e^{-11}$                  | $2.8e^{-11}$                                               | $1.3e^{-07}$    |
|                 | Randomized events<br>( $n_{\text{Speciation}} = 2081$ ;<br>$n_{\text{Duplication}} = 482$ ) | 0.51                         | 0.66                          | 1.29                                                       | 0.73            |

964 *Note:* Median values of  $\sigma^2$  are shown. *P*-value from paired two-sided Wilcoxon test.

965 **Table S3: Summary statistics on OUM trees, passing both the maximum likelihood**  
 966 **and the Bayesian approaches with a posterior probability cutoff of  $\geq 0.7$ .**

967

| Duplication<br>Age | Proportions of regime shifts per branch |                   | Paired two-sided<br>Wilcoxon rank sum test | Regime shift rates (shifts/My) |                   | Two-sided<br>Wilcoxon rank test |
|--------------------|-----------------------------------------|-------------------|--------------------------------------------|--------------------------------|-------------------|---------------------------------|
|                    | After speciation                        | After duplication |                                            | After speciation               | After duplication |                                 |
| Young              | 2.8%                                    | 8.3%              | $8.3e^{-4}$                                | 0.012                          | 0.032             | $6.7e^{-6}$                     |
| Old                | 0%                                      | 16.7%             | $< 2.2e^{-16}$                             | 0.012                          | 0.0025            | $< 2.2e^{-16}$                  |

968 *Note-* Above analyses include 2779 speciation, 486 young, and 548 old duplication events.

969 Values shown in the table indicate median values. The difference in proportions of regime  
 970 shifts per branch after speciation events for two types of duplications is due to the different  
 971 sets of trees used. Few trees shared both types of duplicates. Proportions of regime shifts  
 972 per branch of events is estimated for each tree, and thus paired Wilcoxon test is used to  
 973 compare the difference. A single gene tree can have one or many optima shift rate(s) for  
 974 events, and thus two-sided Wilcoxon rank test was used for comparison.

975

976

**A. Plots on 8520 trees**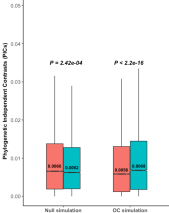**B. Plots on 2082 trees**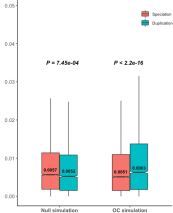

A. Plot using randomized trait,  $\tau$

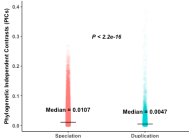

C. Plot using randomized events

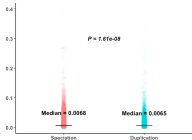

B. Variance distribution for events

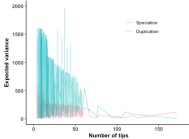

D. Event proportion plot

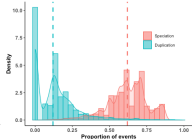

# Plots on contrasts standardized trees

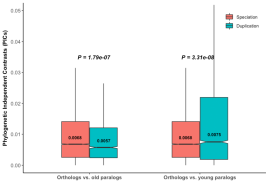

**A. Plot on 4190 trees**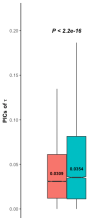**B. Randomized  $\tau$  plot**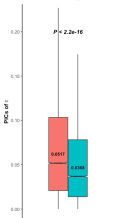**C. Randomized events plot**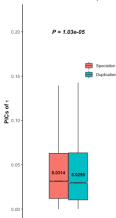

Source: https://www.biorxiv.org/content/10.1101/719336v2.full.pdf
